# Supplementary material
Source: Springer Nature journal article supplement (https://www.springermedizin.de/resource/supplementary/12957_2012_1126_MOESM1_ESM.pdf/9561836)

Case 1

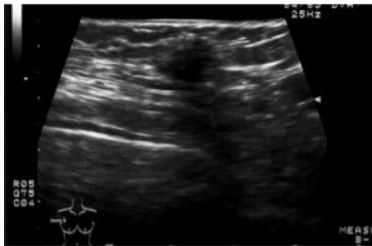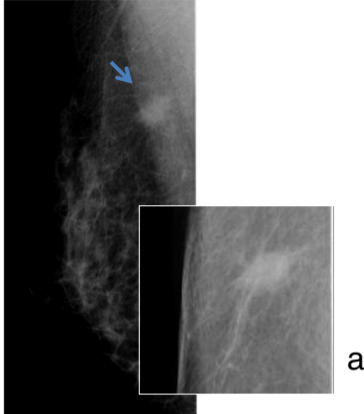

Case 2

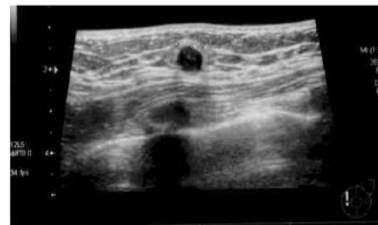

b

Supplement: MOESM1 [file 9561836]
